# Supplementary material
Source: Research Square preprint supplement (doi:10.21203/rs.3.rs-9888033/v2)
Supplement: Supplementary file 1 [file 8765fda5cc793294489c0a91.docx]

### Table S1. Subgroup analysis by parity and educational level

| **Subgroup** | **n** | **SDS_T1** | **SDS_T2** | **SDS_T3** | **SAS_T1** | **SAS_T2** | **SAS_T3** |
| --- | --- | --- | --- | --- | --- | --- | --- |
| ****Parity**** |  |  |  |  |  |  |  |
| Primiparous | 199 | 46.72 | 44.47 | 44.65 | 40.66 | 39.34 | 39.93 |
| Multiparous | 76 | 47.09 | 45.21 | 46.34 | 40.76 | 39.76 | 41.42 |
| ****Education**** |  |  |  |  |  |  |  |
| Middle school or below | 26 | 47.88 | — | — | 44.04 | — | — |
| High school / Secondary technical schooll | 48 | 49.10 | — | — | 41.19 | — | — |
| College / bachelor | 190 | 46.42 | — | — | 40.23 | — | — |
| Postgraduate or above | 11 | 41.45 | — | — | 38.45 | — | — |
