# Supplementary material
Source: Research Square preprint supplement (doi:10.21203/rs.3.rs-9888033/v2)
Supplement: Supplementary file 2 [file b209d07a83c460fbd2170dea.docx]

### Table S3. Full Pearson correlation matrix among SDS and SAS scores across trimesters

|  | **SDS_T1** | **SDS_T2** | **SDS_T3** | **SAS_T1** | **SAS_T2** | **SAS_T3** |
| --- | --- | --- | --- | --- | --- | --- |
| ****SDS_T1**** | 1 |  |  |  |  |  |
| ****SDS_T2**** | 0.677 | 1 |  |  |  |  |
| ****SDS_T3**** | 0.647 | 0.728 | 1 |  |  |  |
| ****SAS_T1**** | 0.725 | 0.561 | 0.573 | 1 |  |  |
| ****SAS_T2**** | 0.545 | 0.749 | 0.646 | 0.610 | 1 |  |
| ****SAS_T3**** | 0.549 | 0.626 | 0.799 | 0.641 | 0.716 | 1 |

Note. All correlations are Pearson correlation coefficients. All correlations were significant at p < 0.001 (two-tailed). N = 275.
