# Supplementary material
Source: Research Square preprint supplement (doi:10.21203/rs.3.rs-9888033/v2)
Supplement: Supplementary file 3 [file c6d45a46afa15e4d18361128.docx]

### Table S2. Change score analysis (T3–T1)

| **Change group** | **Definition** | **SDS n (%)** | **SAS n (%)** |
| --- | --- | --- | --- |
| Improved | Decrease > 5 | 103 (37.5) | 68 (24.7) |
| Stable | -4 to 5 | 120 (43.6) | 163 (59.3) |
| Deteriorated | Increase > 5 | 52 (18.9) | 44 (16.0) |
| **Predictor of change** | | **SDS change B (p)** | **SAS change B (p)** |
| Age | | 0.190 (0.157) | 0.032 (0.773) |
| Parity (multiparous) | | 1.006 (0.401) | 1.318 (0.177) |
| Educational level | | −0.813 (0.265) | 0.653 (0.272) |
| ****Model R²**** | | ****0.015**** | ****0.013**** |

Multiple linear regression. All predictors p > 0.05.
